# Supplementary material for: Nemopilema nomurai jellyfish venom exerts an anti-metastatic effect by inhibiting Smad- and NF-κB-mediated epithelial–mesenchymal transition in HepG2 cells
Source: PubMed Central journal article supplement (PMC5809415; doi:10.1038/s41598-018-20724-3), 2018-02-12
Supplement: 41598_2018_20724_MOESM1_ESM.pdf [file 41598_2018_20724_MOESM1_ESM.pdf]

***Nemopilema nomurai* jellyfish venom exerts an anti-metastatic effect by inhibiting Smad- and NF- $\kappa$ B-mediated epithelial–mesenchymal transition in HepG2 cells**

Hyunkyung Lee<sup>1,3</sup>, Min Jung Pyo<sup>1</sup>, Seong Kyeong Bae<sup>1</sup>, Yunwi Heo<sup>4</sup>, Indu Choudhary<sup>1</sup>, Duhyeon Hwang<sup>3</sup>, Hyeryeon Yang<sup>1</sup>, Je-hein Kim<sup>4</sup>, Jinho Chae<sup>5</sup>, Chang Hoon Han<sup>2</sup>, Changkeun Kang<sup>1</sup>, Seungshic Yum<sup>6,7\*</sup>, Euikyung Kim<sup>1,3\*</sup>

**Fig.2A**

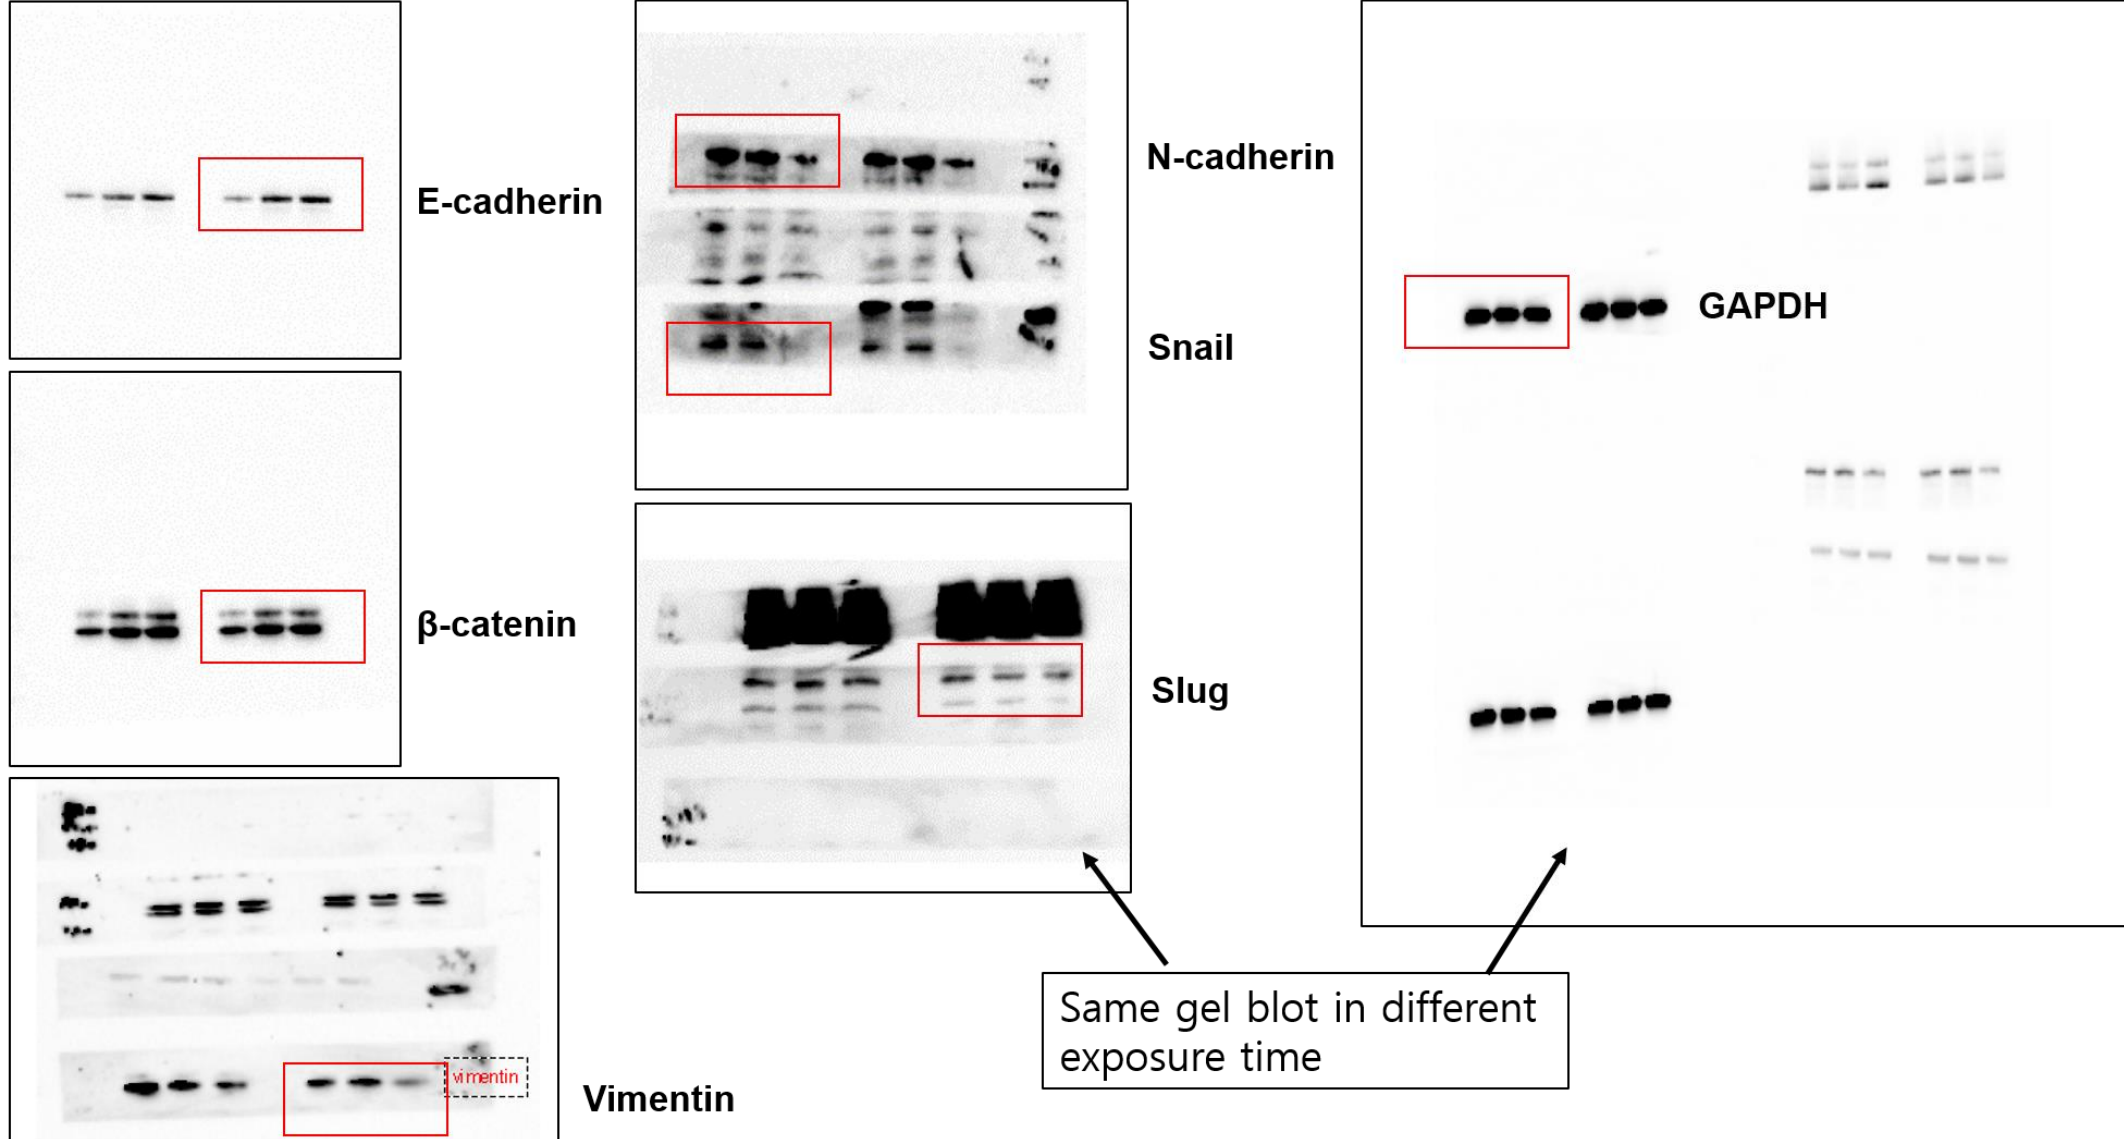

Fig.2B

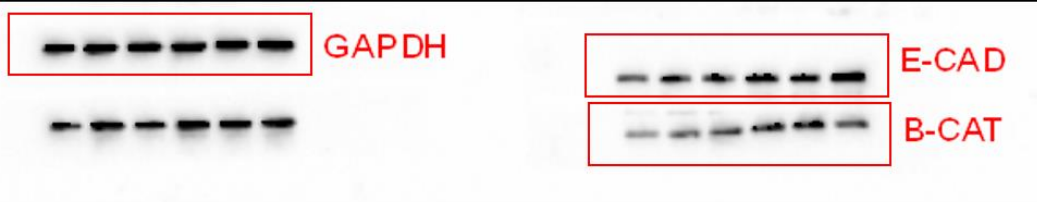

E-cadherin  
 $\beta$ -catenin

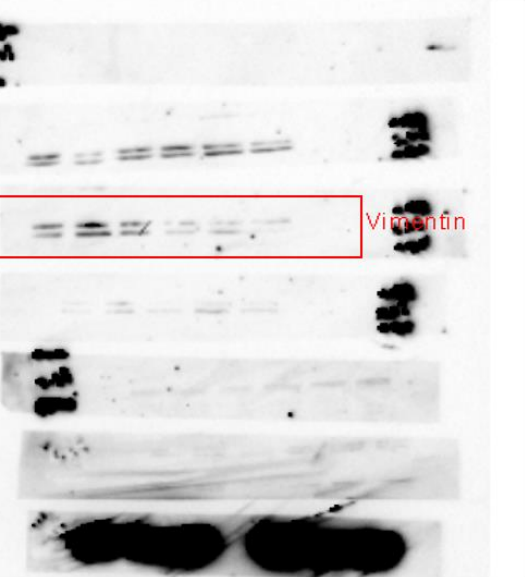

Vimentin

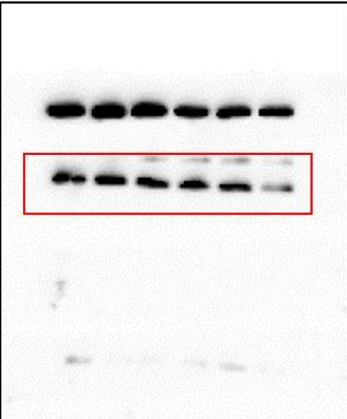

Snail

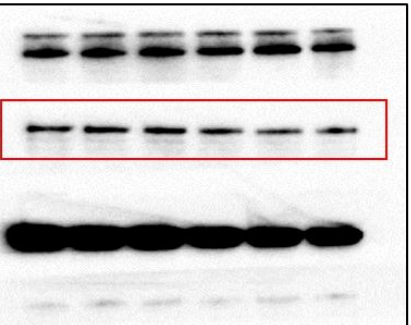

Slug

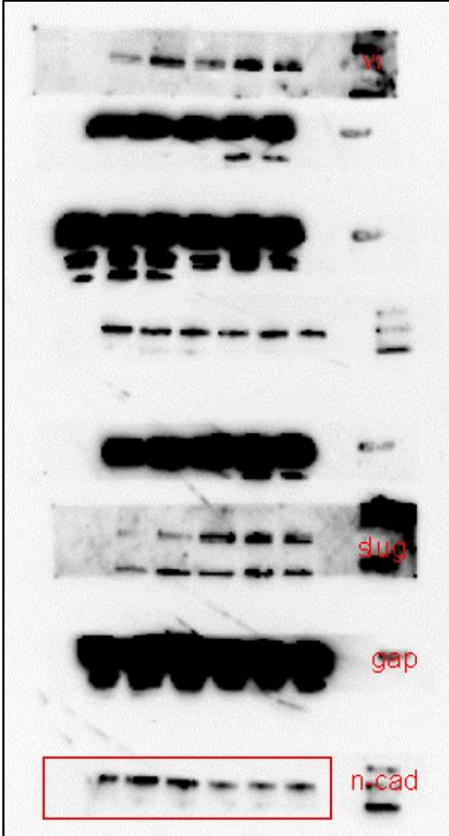

N-caherin

Fig.4A

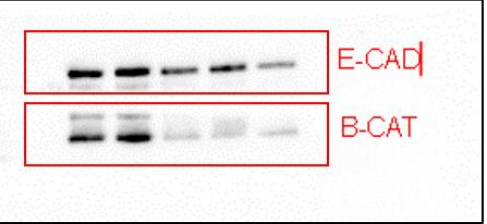

**E-cadherin**  
**β-catenin**

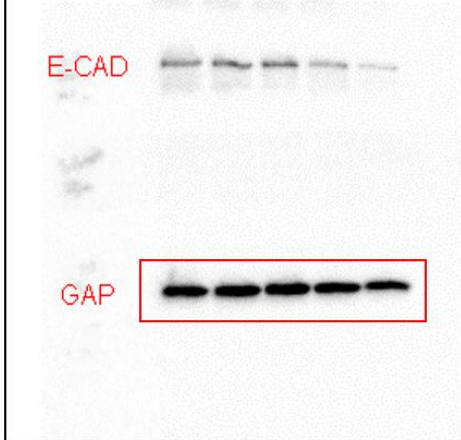

**GAPDH**

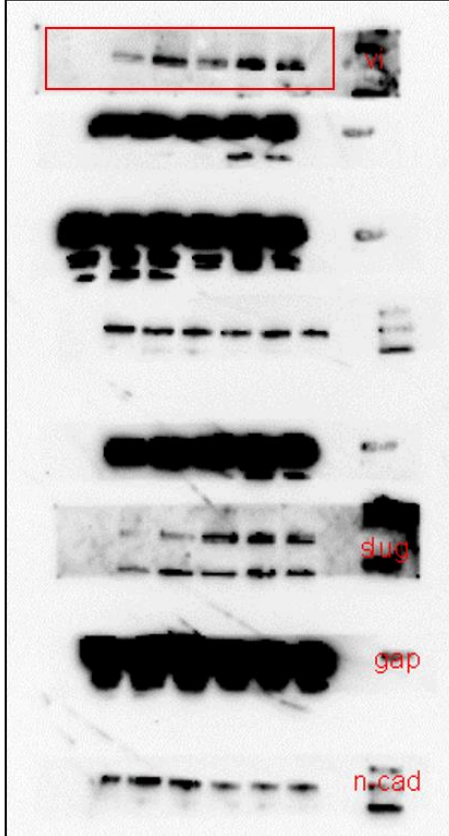

**Vimentin**

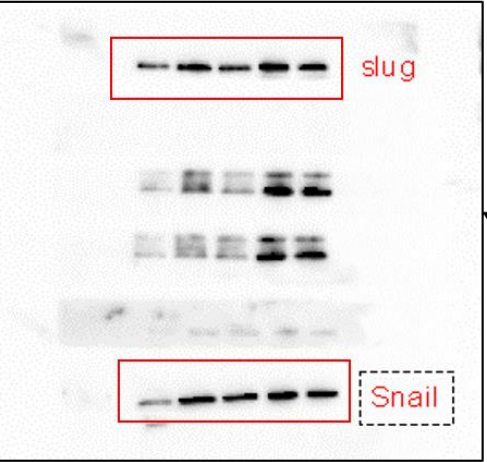

**Slug**

**Snail**

Same gel blot in different exposure time

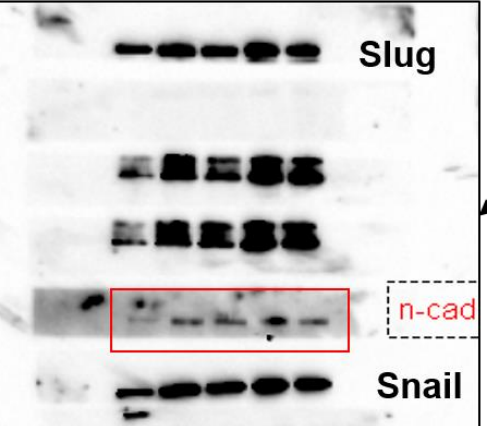

**N-cadherin**

**Snail**

**Fig.4B**

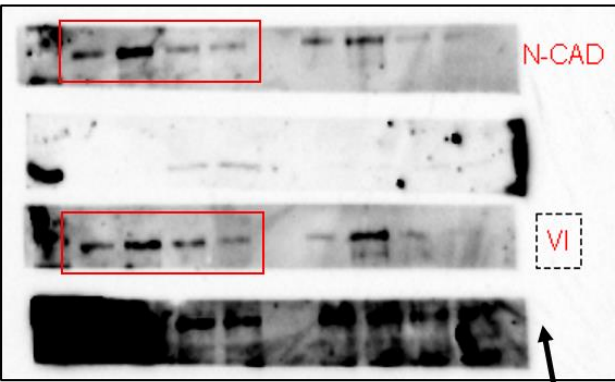

**N-cadherin**

**Vimentin**

Same gel blot in different exposure time

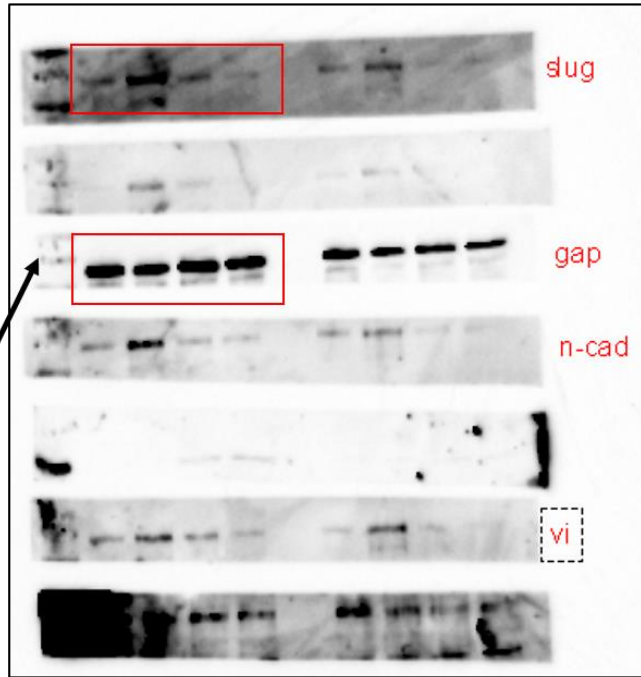

**Slug**

**GAPDH**

gap

n-cad

vi

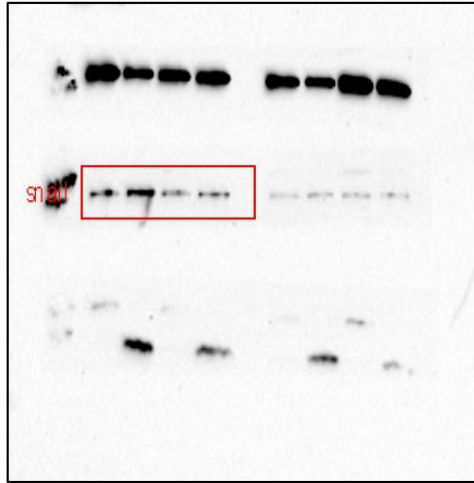

**Snail**

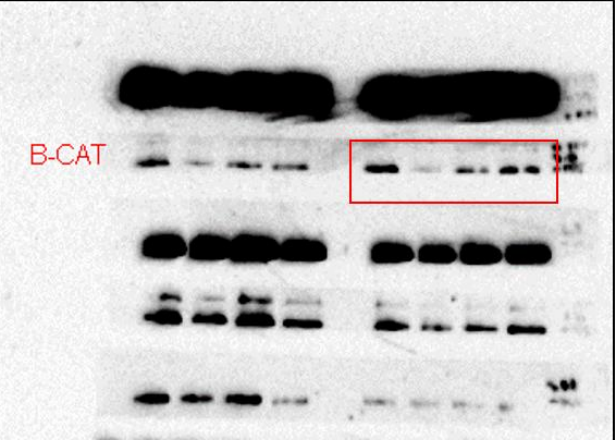

**β-catenin**

Same gel blot in different exposure time

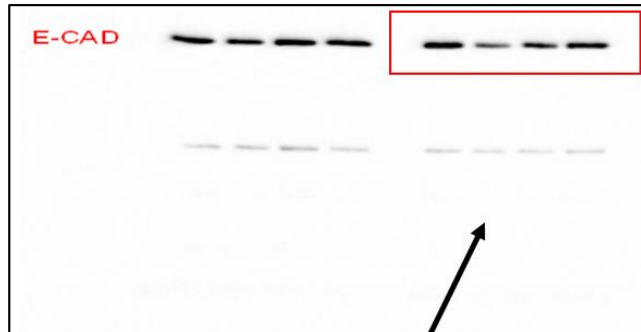

**E-cadherin**

E-CAD

Fig.5A

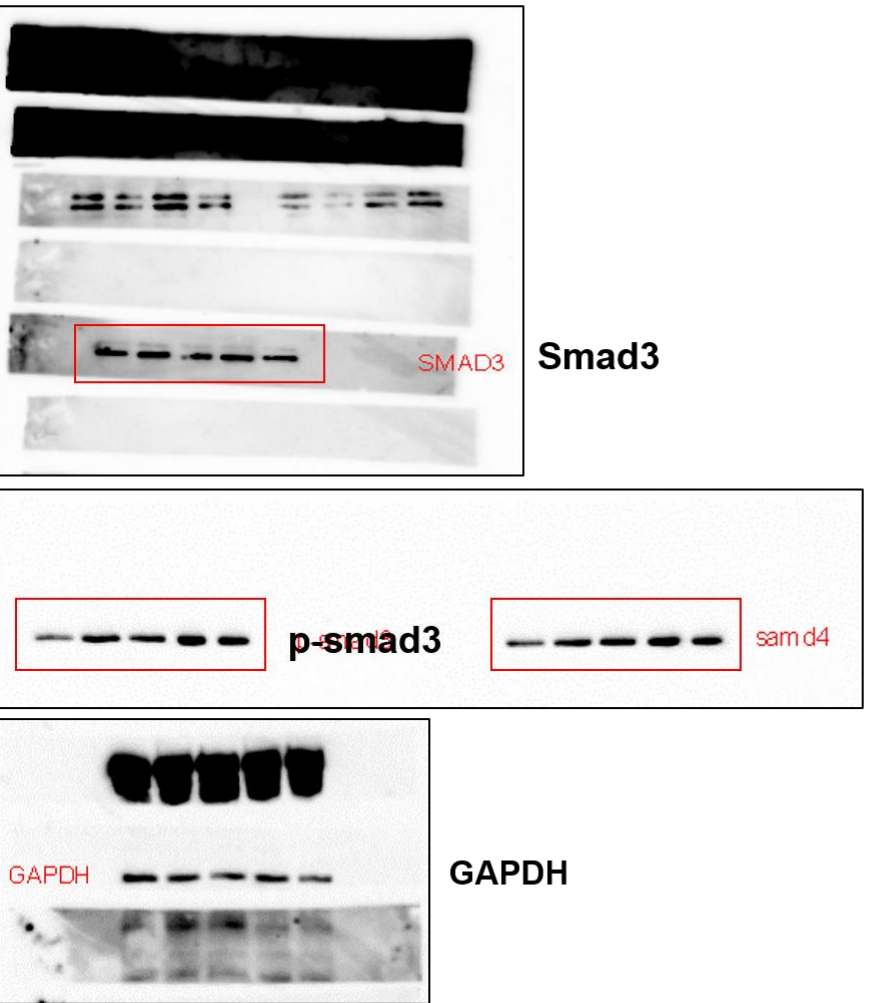

Fig.5B

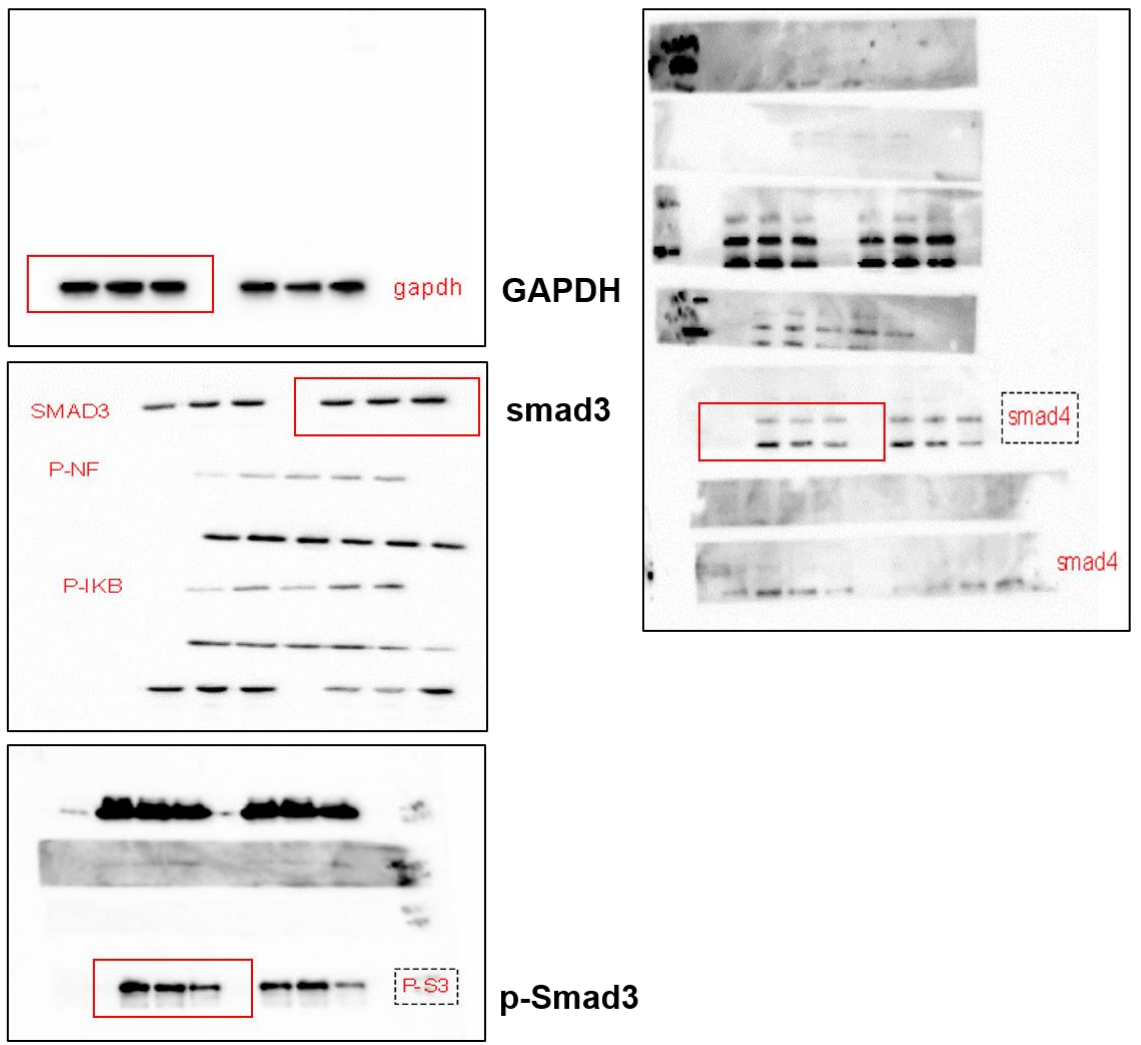

**Fig.5C**

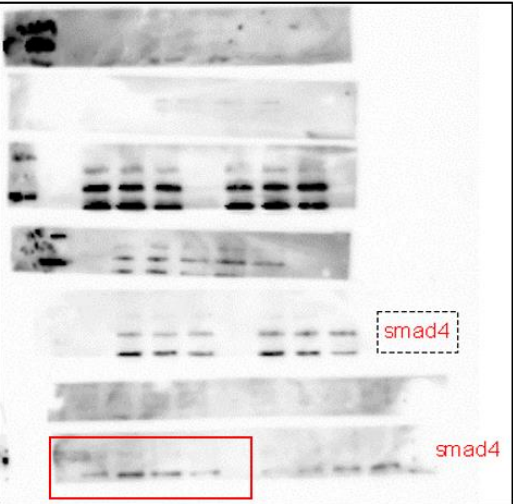

**Smad4**

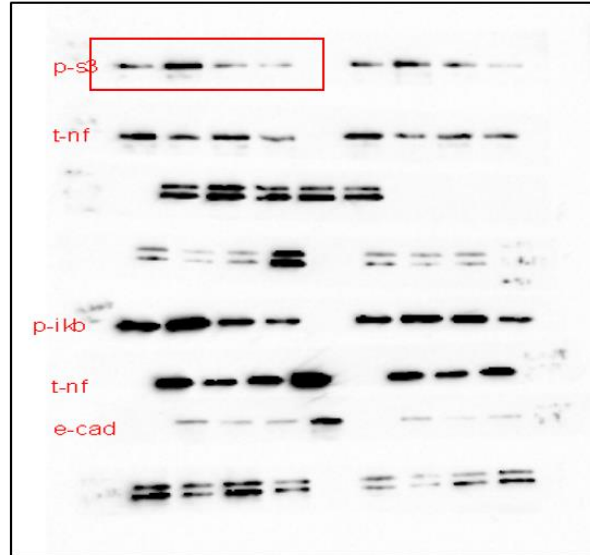

**p-Smad3**

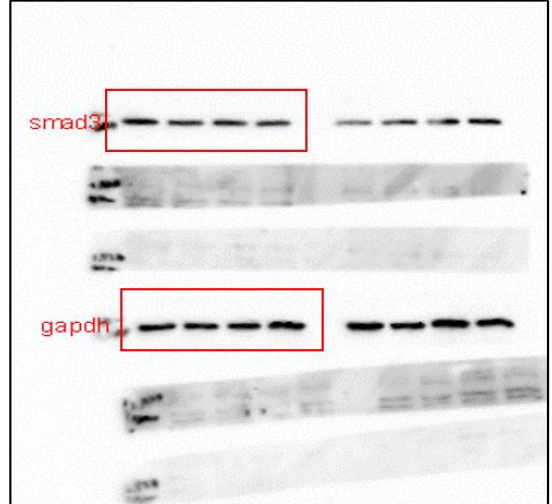

**smad3**

**GAPDH**

**Fig.6A**

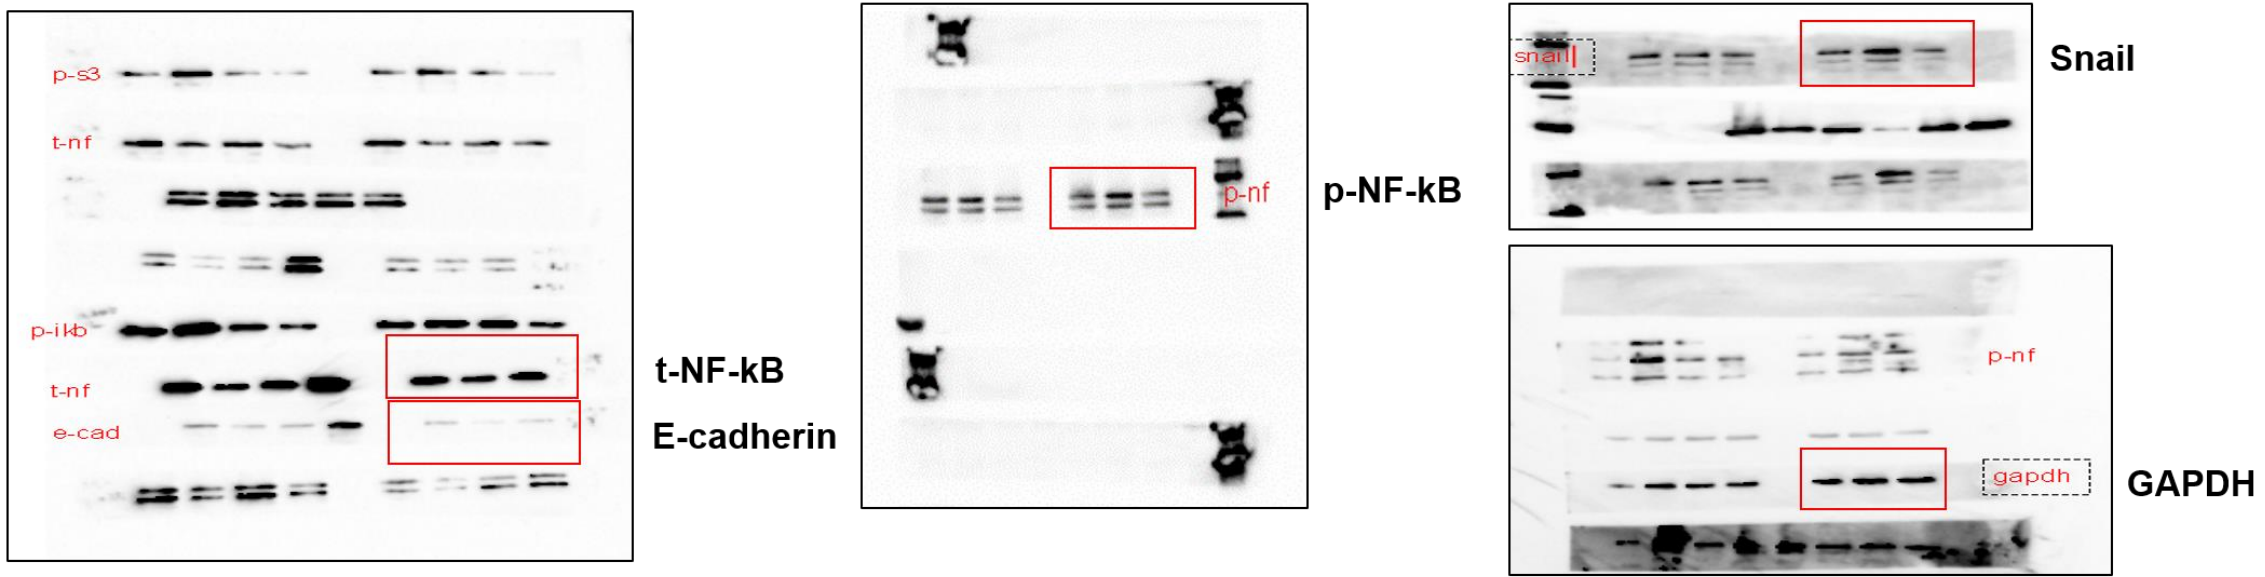

**Fig.6D**

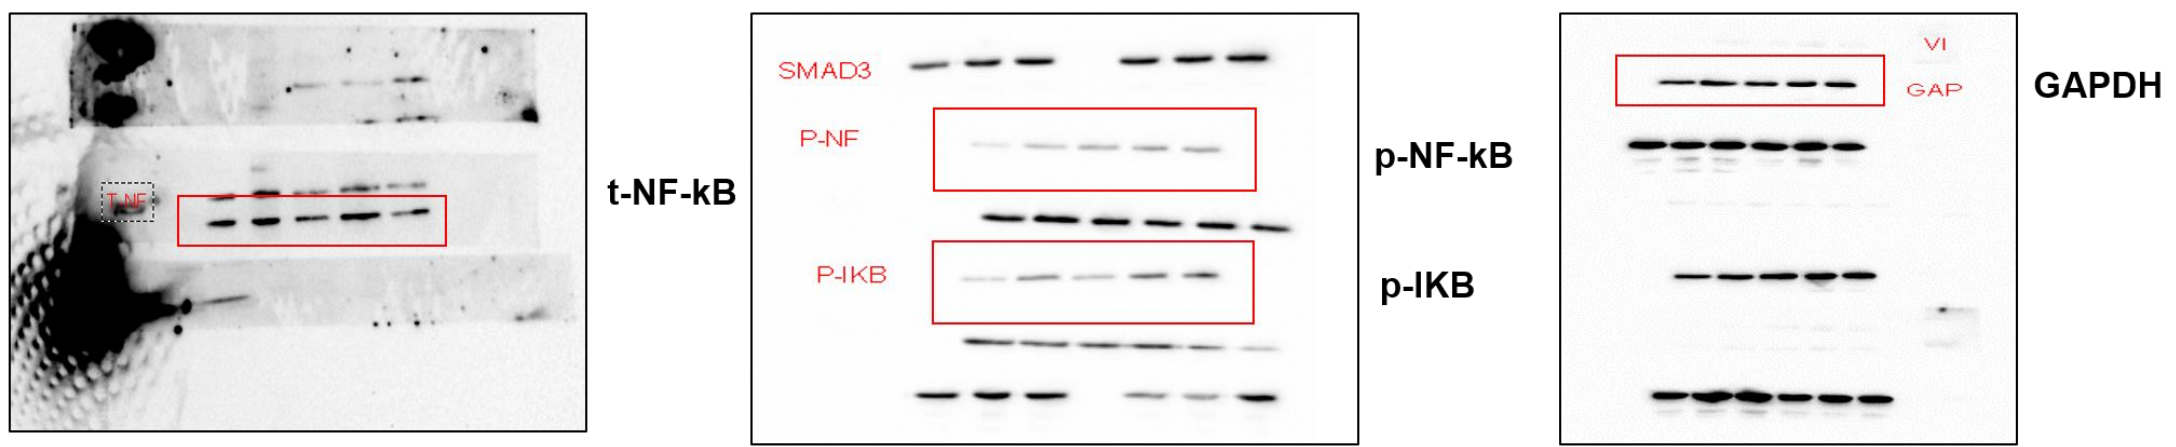



**Fig.6E**

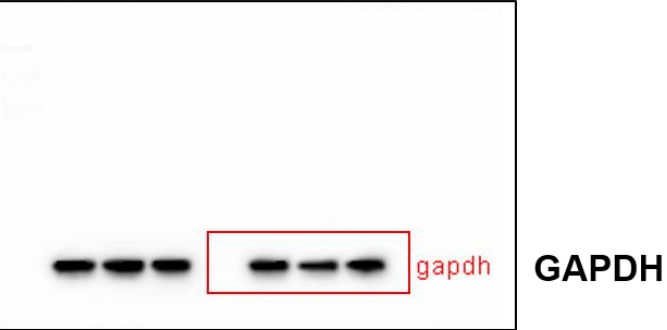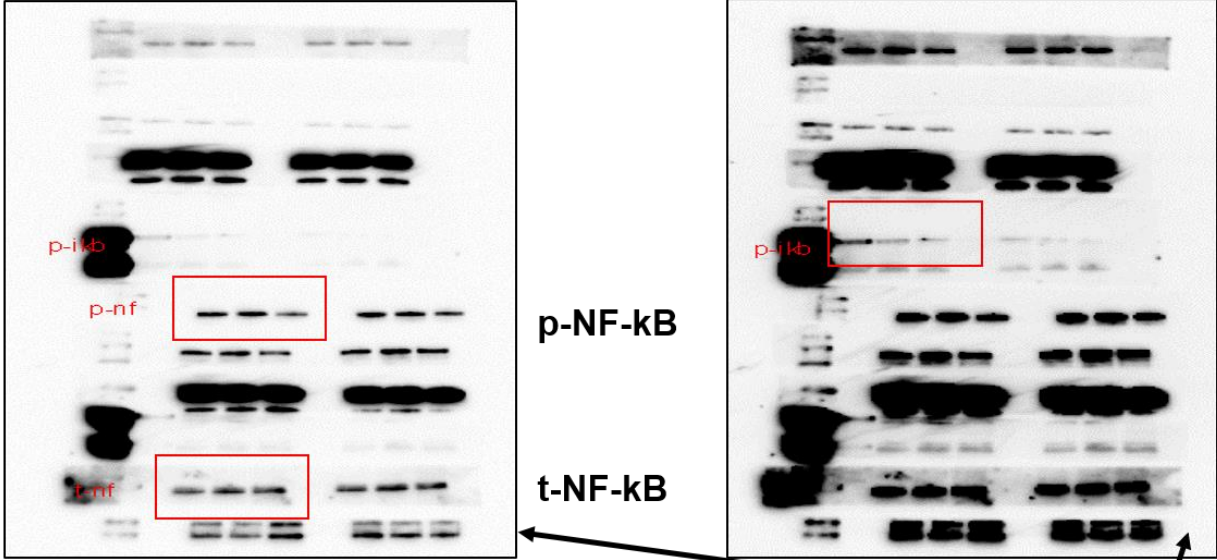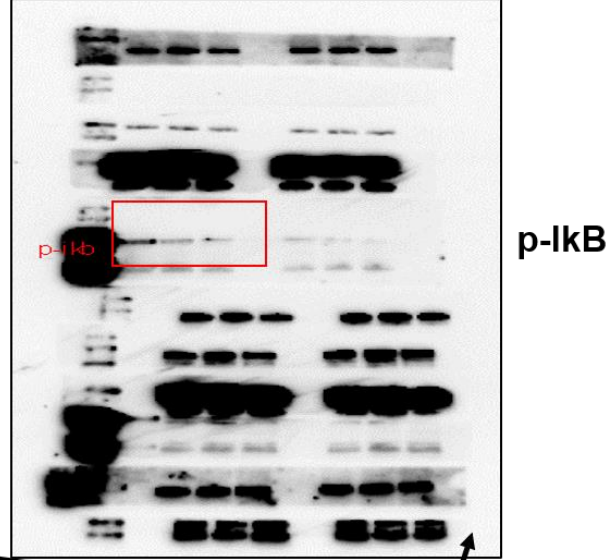

**Fig.6F**

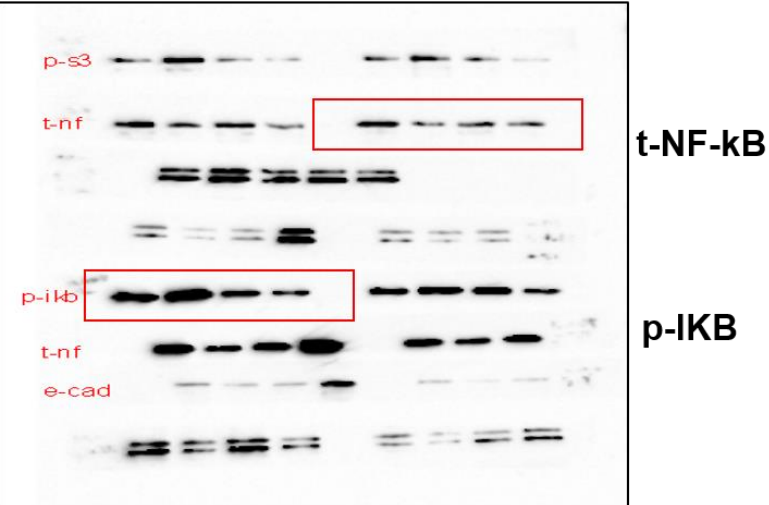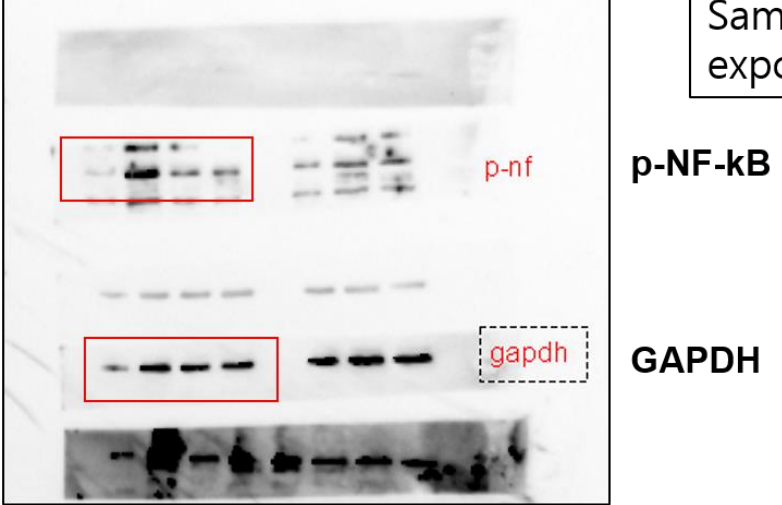

Same gel blot in different exposure time
